# Supplementary material for: Ortho-phenylenediamine-based open and macrocyclic receptors in selective sensing of H2PO4−, ATP and ADP under different conditions
Source: Royal Society of Chemistry journal article supplement (doi:10.1039/c2ob26995c), 2012-01-01

## Supporting information

### ***Ortho*-phenylenediamine-based open and macrocyclic receptors in selective sensing of $\text{H}_2\text{PO}_4^-$ , ATP and ADP under different conditions**

**Kumares Ghosh\* and Indrajit Saha**

*Department of Chemistry,  
University of Kalyani, Kalyani-741235, India.  
Email: ghosh\_k2003@yahoo.co.in, Fax: +913325828282; Tel: +913325828750.*

1. Change in fluorescence intensity of receptor **1** in  $\text{CH}_3\text{CN}$ .
2. Change in fluorescence intensity of receptor **2** in  $\text{CH}_3\text{CN}$ .
3. Change in absorbance of receptor **1** in  $\text{CH}_3\text{CN}$ .
4. Change in absorbance of receptor **2** in  $\text{CH}_3\text{CN}$ .
5. Fluorescence ratio of **1** in  $\text{CH}_3\text{CN}$ .
6. Plot of ratio of excimer to monomer emissions with guest concentrations.
7. Fluorescence titration curve for **1** with anions.
8. Fluorescence Job plots of receptor **1**  $\text{H}_2\text{PO}_4^-$ ,  $\text{F}^-$ , Fumarate and  $\text{ClO}_4^-$  in  $\text{CH}_3\text{CN}$ .
9. Fluorescence decay curves for **1** with  $\text{H}_2\text{PO}_4^-$  anion.
10. Fluorescence decay curves for **1** with  $\text{H}_2\text{PO}_4^-$  and  $\text{ClO}_4^-$  anions.
11. Partial  $^1\text{H}$  NMR of **1** with  $\text{AcO}^-$  and  $\text{F}^-$  in  $\text{CD}_3\text{CN}$ .
12. Partial  $^1\text{H}$  NMR of **1** with  $\text{AcO}^-$  and  $\text{F}^-$  in  $d_6$ -DMSO.
13. Fluorescence titration curves ( $[\text{Guest}]/[\text{Host}]$  vs change in emission) of **2**.
14. Fluorescence ratio of receptor **2** upon addition of 4.0 equiv of a particular anion in  $\text{CH}_3\text{CN}$ .
15. Fluorescence Job plots of receptor **2** with (a)  $\text{H}_2\text{PO}_4^-$  and (b) fumarate in  $\text{CH}_3\text{CN}$ .
16. Fluorescence decays of (a) **2** and (b) in the presence of equiv. amount of  $\text{H}_2\text{PO}_4^-$  ions in  $\text{CH}_3\text{CN}$ .
17. Selectivity study.
18.  $^1\text{H}$  NMR of **2** with  $\text{F}^-$ .
19. Change in emission of **1** upon addition of various anions in  $\text{CH}_3\text{CN}:\text{H}_2\text{O}$  (1:1, v/v).
20. Change in emission of **2** upon addition of various anions in  $\text{CH}_3\text{CN}:\text{H}_2\text{O}$  (1:1, v/v).
21. PF6 structure of **1** with ADP.
22. Fluorescence job plots of **1** with ADP and ATP.
23. Change in emission of **2** with ADP and ATP.
24.  $^1\text{H}$  NMR of **2** in  $d_6$ -DMSO with ATP and ADP.
25. Spectral data for **1** and **2**.

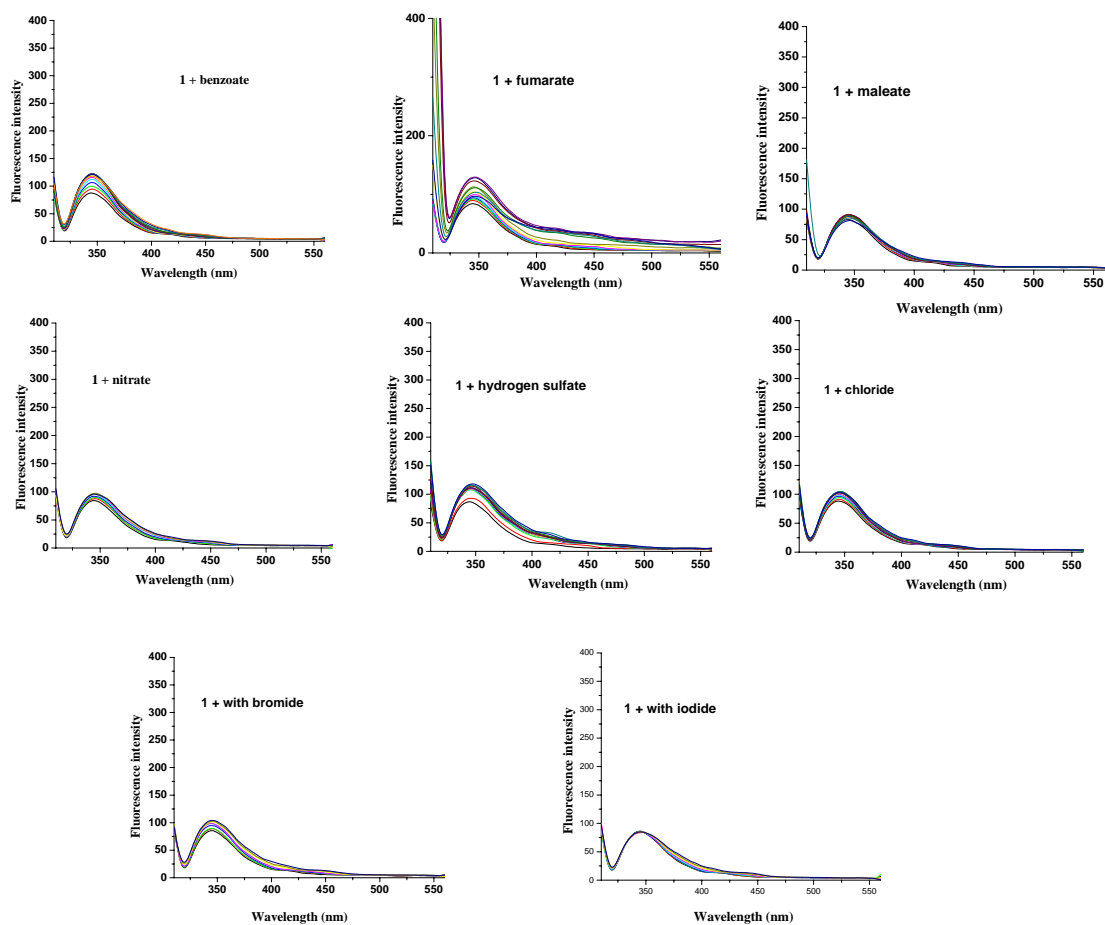

**Figure S1.** Change in fluorescence intensity of receptor 1 ( $c = 3.75 \times 10^{-5} \text{ M}$ ) upon addition anions ( $c = 1.5 \times 10^{-3} \text{ M}$ ) in  $\text{CH}_3\text{CN}$  ( $\lambda_{\text{ex}} = 300 \text{ nm}$ ).

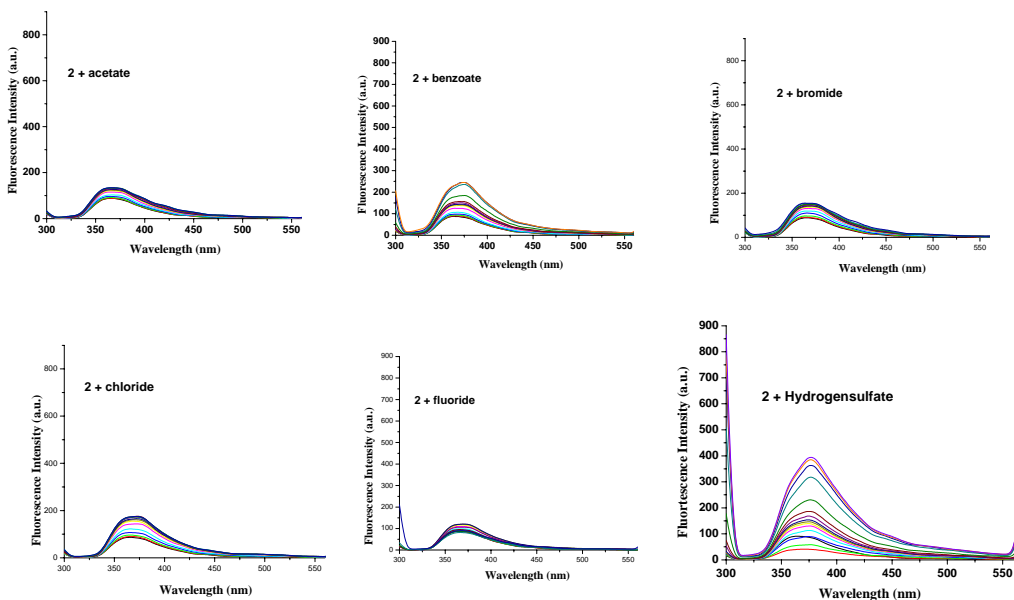

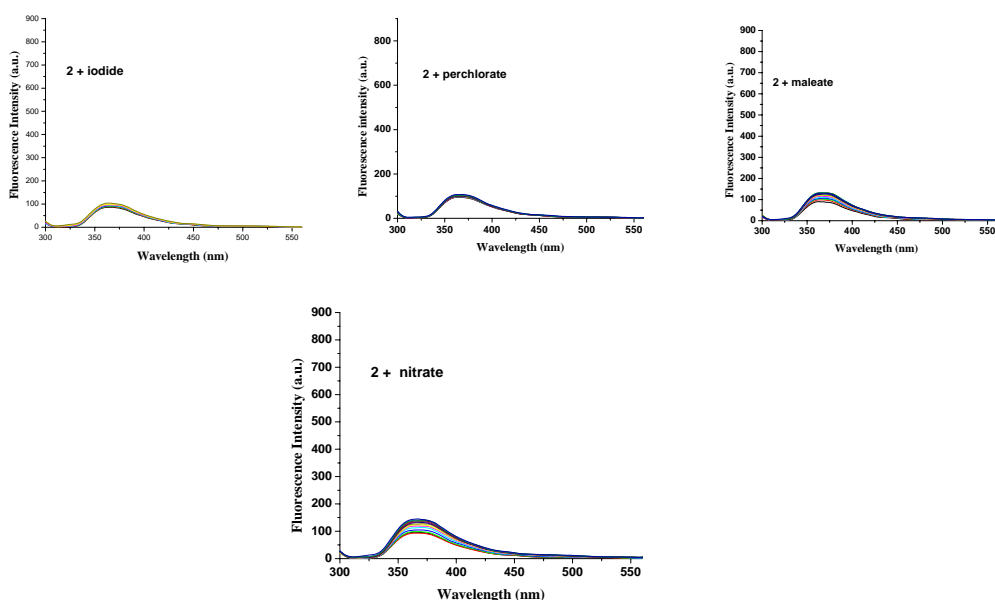

**Figure S2.** Change in fluorescence intensity of receptor **2** ( $c = 3.43 \times 10^{-5}$  M) upon addition anions ( $c = 1.5 \times 10^{-3}$  M) in  $\text{CH}_3\text{CN}$  ( $\lambda_{\text{ex}} = 300$  nm).

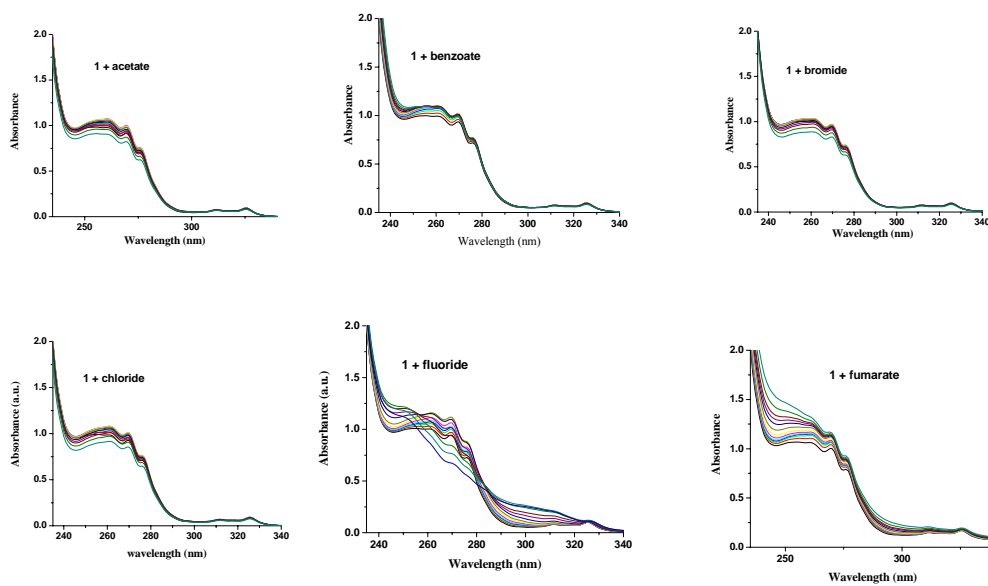

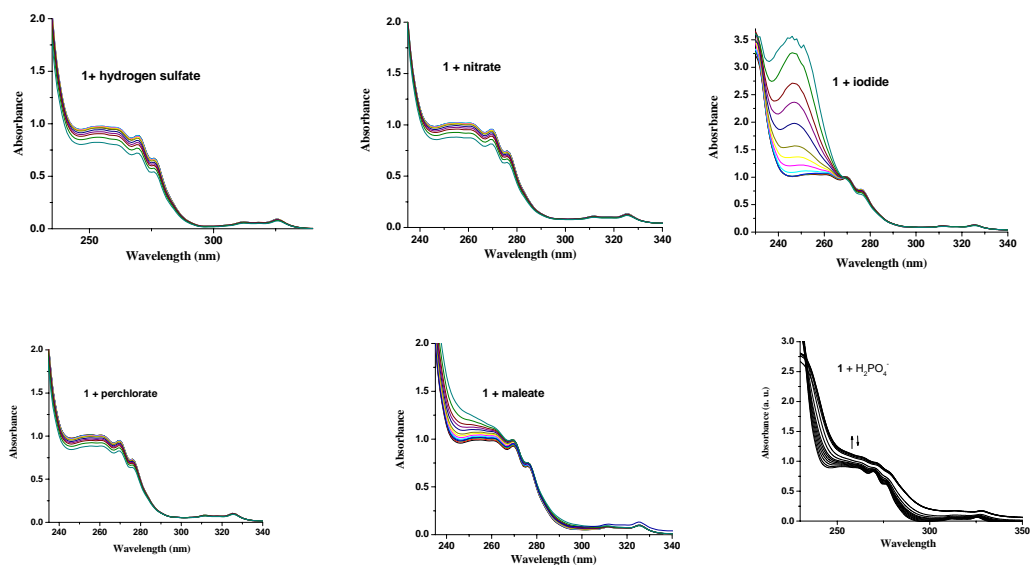

**Figure S3.** Change in absorbance of receptor **1** ( $c = 3.75 \times 10^{-5} \text{ M}$ ) upon addition anions ( $c = 1.5 \times 10^{-3} \text{ M}$ ) in  $\text{CH}_3\text{CN}$  ( $\lambda_{\text{ex}} = 300 \text{ nm}$ ).

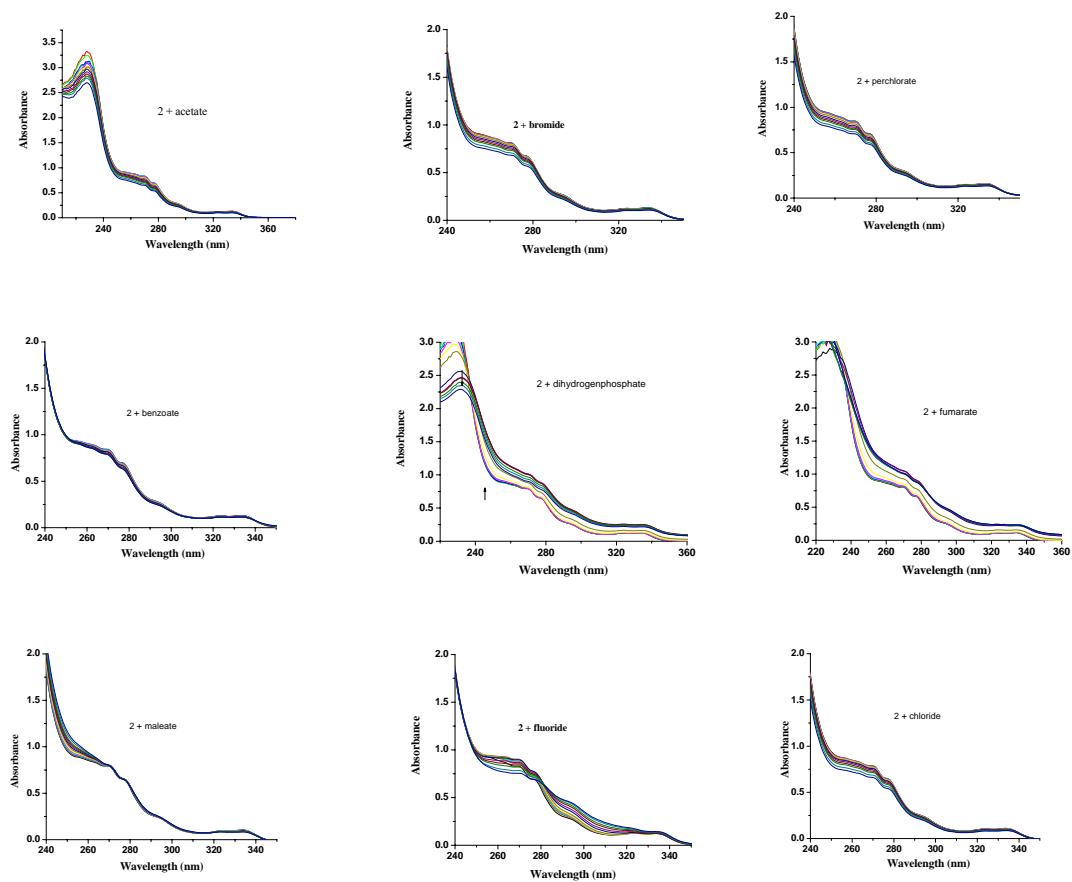

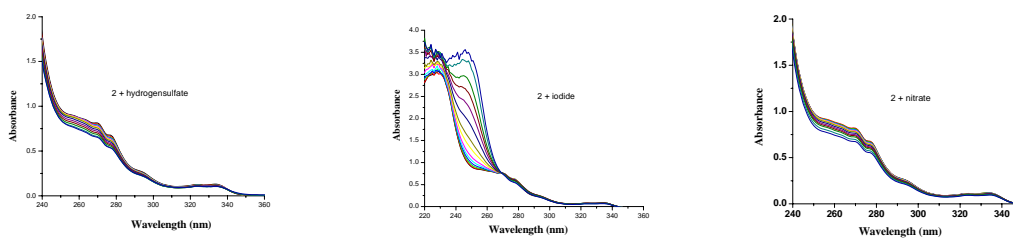

**Figure S4.** Change in absorbance of receptor **2** ( $c = 3.43 \times 10^{-5}$  M) upon addition anions ( $c = 1.5 \times 10^{-3}$  M) in  $\text{CH}_3\text{CN}$  ( $\lambda_{\text{ex}} = 300$  nm).

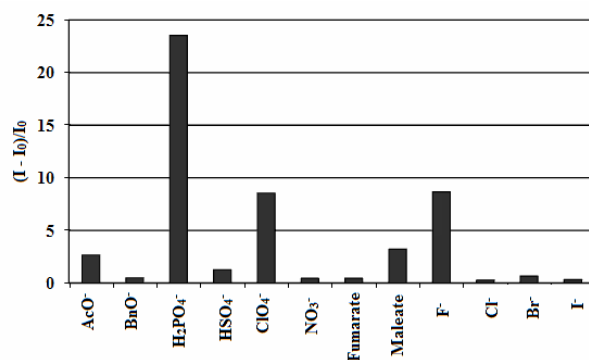

**Figure S5.** Fluorescence ratio ( $I - I_0/I_0$ ) of receptor **1** ( $c = 3.75 \times 10^{-5}$  M) at 422 nm upon addition of 10.0 equiv. amounts of a particular anion in  $\text{CH}_3\text{CN}$ .

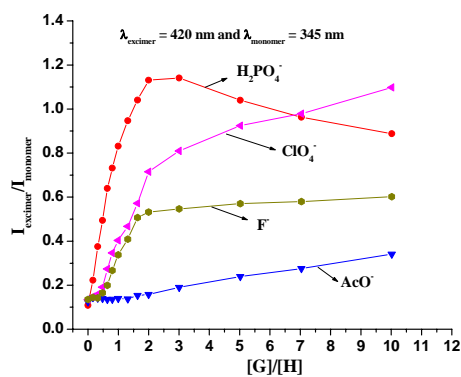

**Figure S6.** Ratio of excimer to monomer emissions of **1** ( $c = 3.75 \times 10^{-5}$  M) with increase in concentration of anions in  $\text{CH}_3\text{CN}$ .

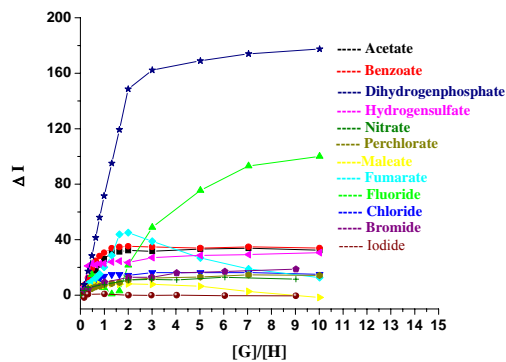

**Figure S7.** Fluorescence titration curves ( $[Guest]/[Host]$  vs change in emission) of **1** ( $c = 3.75 \times 10^{-5}$  M) measured at 345 nm in  $CH_3CN$ .

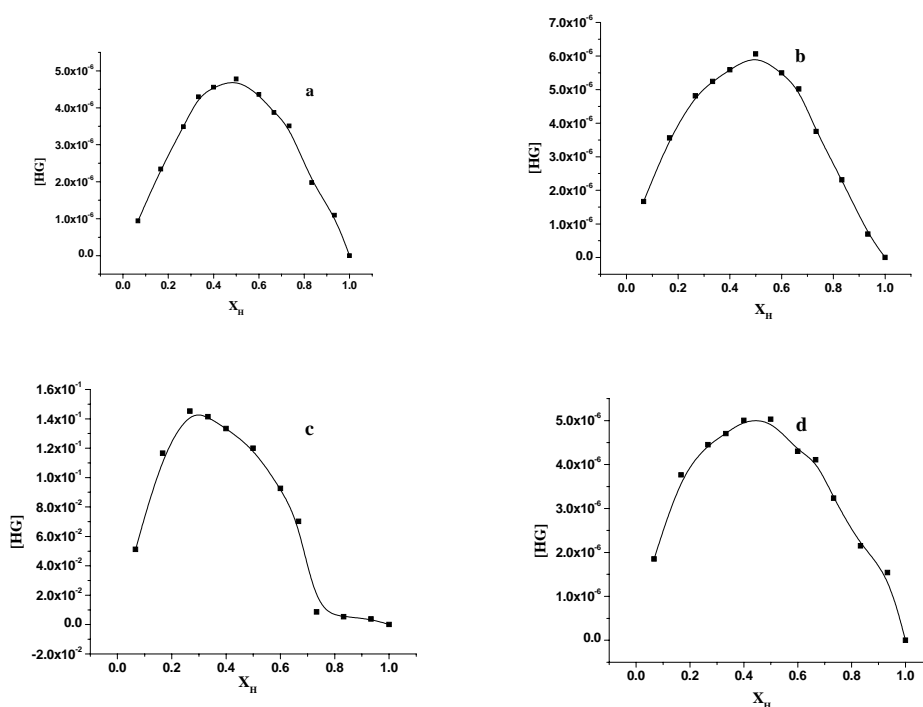

**Figure S8.** Fluorescence Job plots of receptor **1** ( $3.97 \times 10^{-5}$  M) with a)  $H_2PO_4^-$ , b)  $F^-$ , c) Fumarate and d)  $ClO_4^-$  in  $CH_3CN$ .

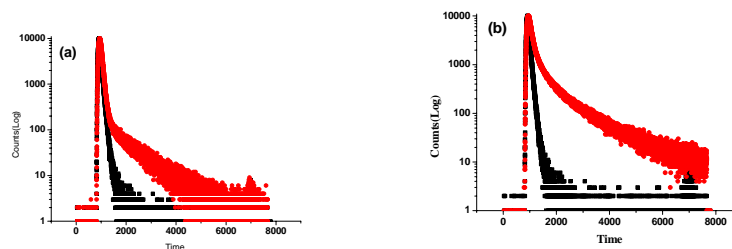

**Figure S9.** Fluorescence decays of (a) **1** ( $c = 4.24 \times 10^{-5}$  M) in  $CH_3CN$  measured at 345 nm ( $\lambda_{ex} = 300$  nm); (b) **1** ( $c = 4.24 \times 10^{-5}$  M) in the presence of equivalent amount of  $H_2PO_4^-$  ions in  $CH_3CN$  measured at 345 nm ( $\lambda_{ex} = 300$  nm).

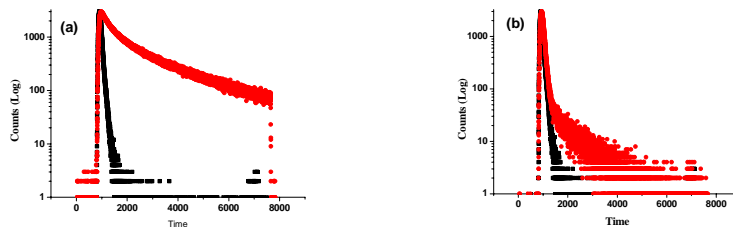

**Figure S10.** Fluorescence decays of (a) **1** ( $c = 4.24 \times 10^{-5}$  M) in the presence of equivalent amount of  $\text{H}_2\text{PO}_4^-$  ions in  $\text{CH}_3\text{CN}$  measured at 420 nm ( $\lambda_{\text{ex}} = 300$  nm); (b) **1** ( $c = 4.24 \times 10^{-5}$  M) in the presence of equivalent amount of  $\text{ClO}_4^-$  ions in  $\text{CH}_3\text{CN}$  measured at 345 nm ( $\lambda_{\text{ex}} = 300$  nm).

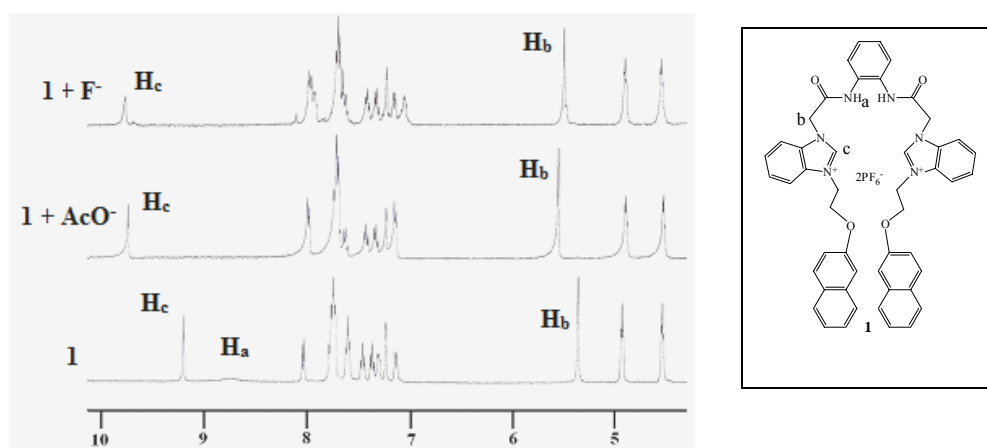

**Figure S11.** Partial  $^1\text{H}$  NMR ( $\text{CD}_3\text{CN}$ , 400 MHz) of **1** ( $c = 2.65 \times 10^{-3}$  M) with equivalent amount of  $\text{AcO}^-$  and  $\text{F}^-$ .

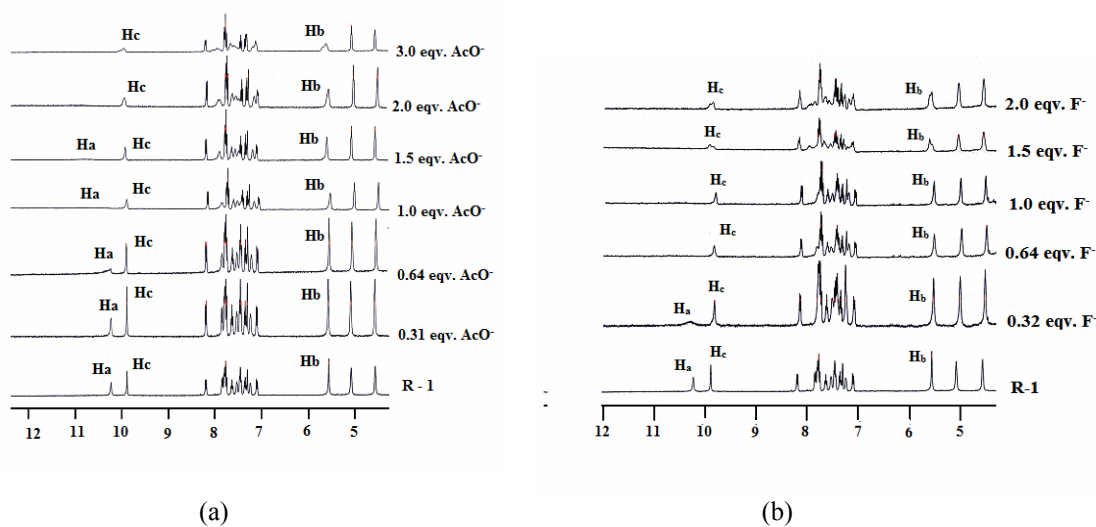

**Figure S12.** Change in  $^1\text{H}$  NMR (400 MHz) of **1** ( $c = 2.67 \times 10^{-3}$  M) upon successive addition of tetrabutylammonium (a) acetate, (b) fluoride in  $\text{d}_6\text{-DMSO}$ .

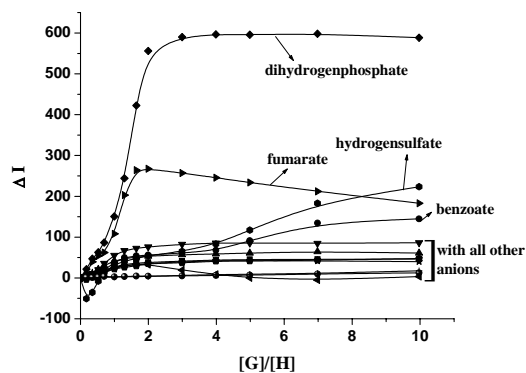

**Figure S13.** Fluorescence titration curves ( $[Guest]/[Host]$  vs change in emission) of **2** ( $c = 3.43 \times 10^{-5}$  M) measured at 365 nm in  $CH_3CN$ .

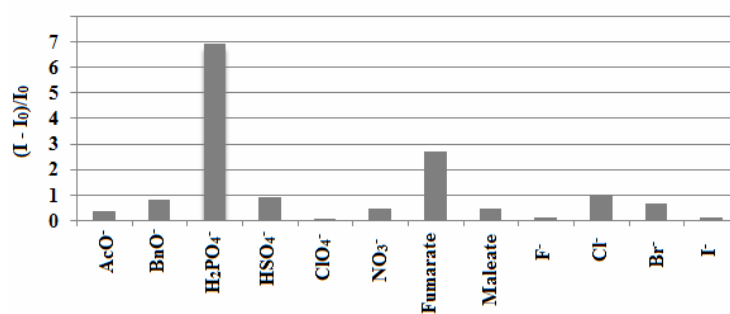

**Figure S14.** Fluorescence ratio ( $I - I_0/I_0$ ) of receptor **2** ( $c = 3.43 \times 10^{-5}$  M) at 365 nm upon addition of 4.0 equiv of a particular anion in  $CH_3CN$ .

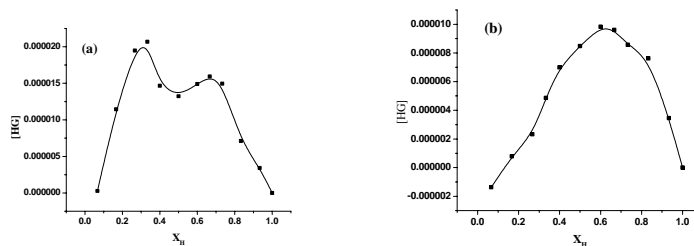

**Figure S15.** Fluorescence Job plots of receptor **2** ( $4.42 \times 10^{-5}$  M) with (a)  $H_2PO_4^-$  and (b) fumarate in  $CH_3CN$ .



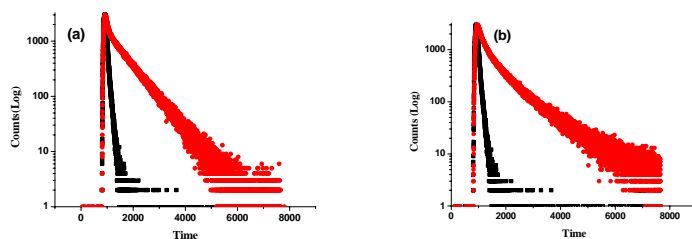

**Figure S16.** Fluorescence decays of (a) **2** ( $c = 2.88 \times 10^{-5}$  M) and (b) **2** ( $c = 2.88 \times 10^{-5}$  M) in the presence of equivalent amount of  $\text{H}_2\text{PO}_4^-$  ions in  $\text{CH}_3\text{CN}$  measured at 365 nm ( $\lambda_{\text{ex}} = 300$  nm).

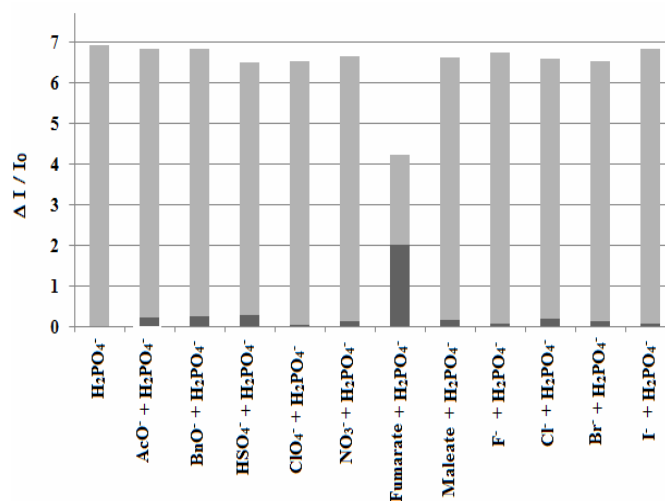

**Figure S17.** Change in fluorescence ratio of receptor **2** ( $c = 3.43 \times 10^{-5}$  M) upon addition of 10 equivalent amounts of  $\text{H}_2\text{PO}_4^-$  in the presence of other anions in  $\text{CH}_3\text{CN}$ .

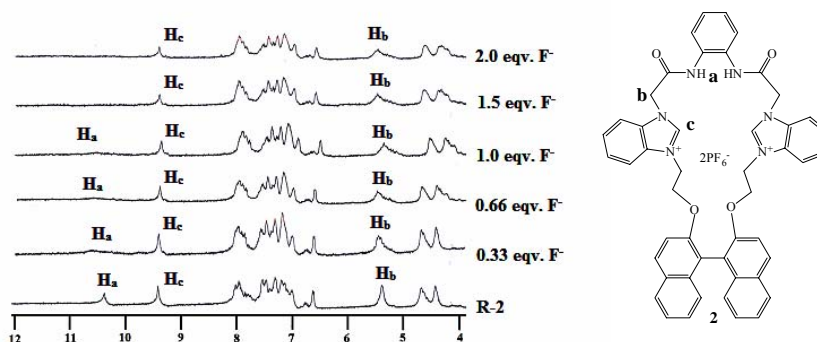

**Figure S18.** Change in  $^1\text{H}$  NMR (400 MHz) of **2** ( $c = 2.85 \times 10^{-3}$  M) upon successive addition of tetrabutylammonium fluoride in  $\text{d}_6\text{-DMSO}$ .

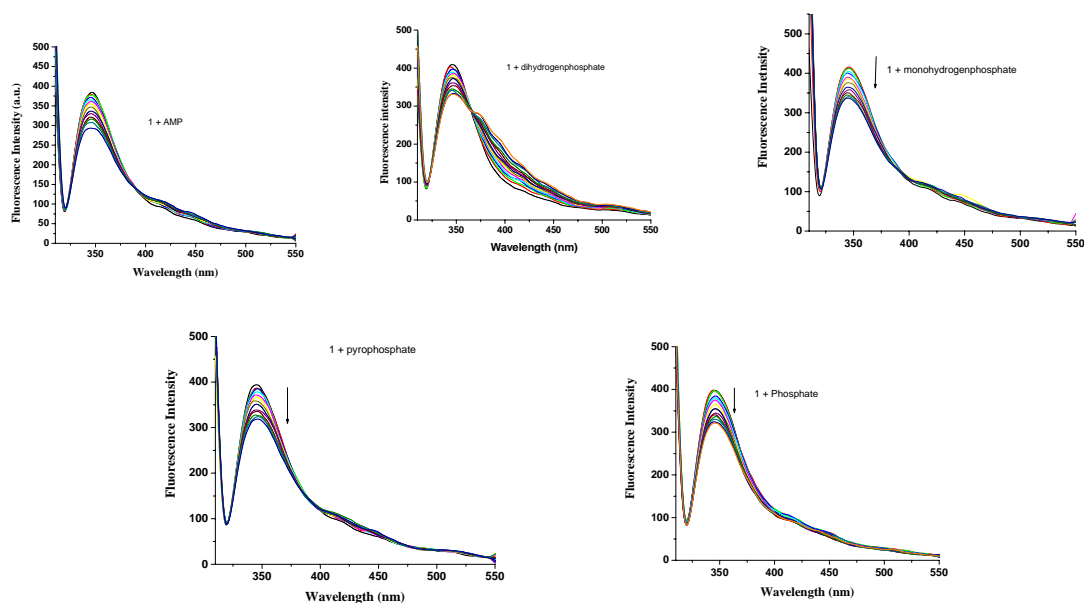

**Figure S19.** Change in emission of receptor **1** ( $c = 4.92 \times 10^{-5}$  M,  $\lambda_{\text{ex}} = 300$  nm, slit ex/em = 9/11,  $\lambda_{\text{max}} = 345$  nm, filter = open) upon addition of various anions in  $\text{CH}_3\text{CN}:\text{H}_2\text{O}$  (1:1, v/v).

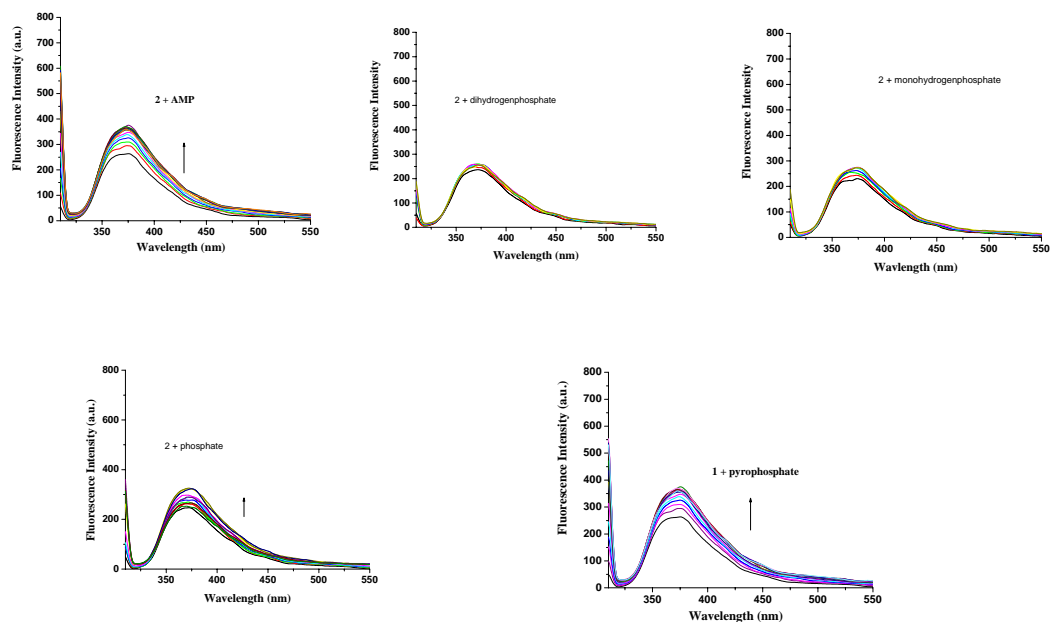

**Figure S20.** Change in emission of receptor **2** ( $c = 3.83 \times 10^{-5}$  M,  $\lambda_{\text{ex}} = 300$  nm, slit ex/em = 9/11,  $\lambda_{\text{max}} = 345$  nm, filter = open) upon addition of various anions in  $\text{CH}_3\text{CN}:\text{H}_2\text{O}$  (1:1, v/v).

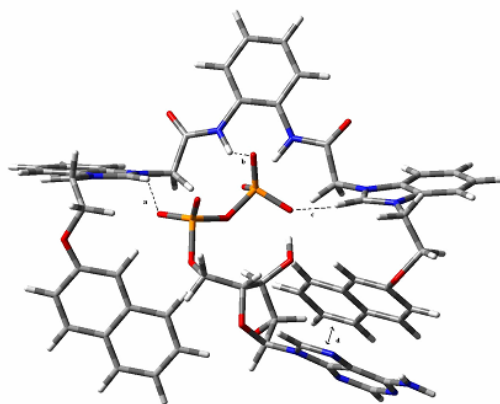

**Figure S21.** PM6 optimized structure for **1** with ADP ( $a = 2.06 \text{ \AA}$ ,  $b = 1.77 \text{ \AA}$ ,  $c = 1.71 \text{ \AA}$ ,  $d = 2.17 \text{ \AA}$ ) in  $\text{CH}_3\text{CN}$ .

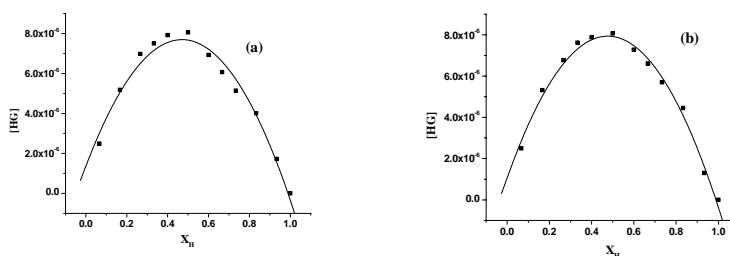

**Figure S22.** Fluorescence Job plots of receptor **1** ( $c = 5.32 \times 10^{-5} \text{ M}$ ) with (a) ADP and (b) ATP in  $\text{CH}_3\text{CN}:\text{H}_2\text{O}$  (1:1, v/v).

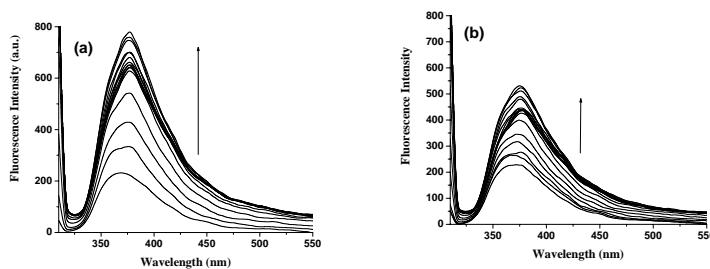

**Figure S23.** Change in emission of receptor **2** ( $c = 3.83 \times 10^{-5} \text{ M}$ ) with increase in concentrations of (a) ATP and (b) ADP upon excitation at 300 nm in  $\text{CH}_3\text{CN}/\text{H}_2\text{O}$  (1:1, v/v).

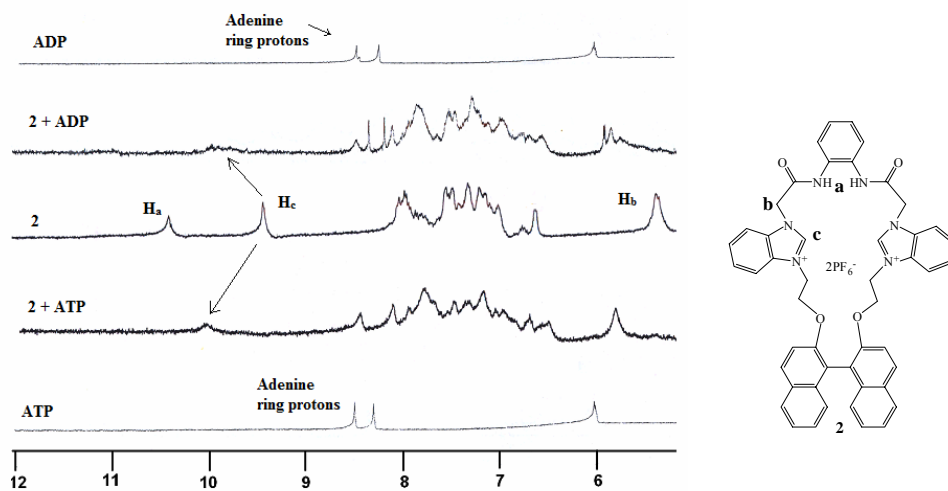

**Figure S24.** Partial <sup>1</sup>H NMR (DMSO -*d*<sub>6</sub>, 400 MHz) of **2** ( $c = 2.65 \times 10^{-3}$  M) with equivalent amount of ATP and ADP.

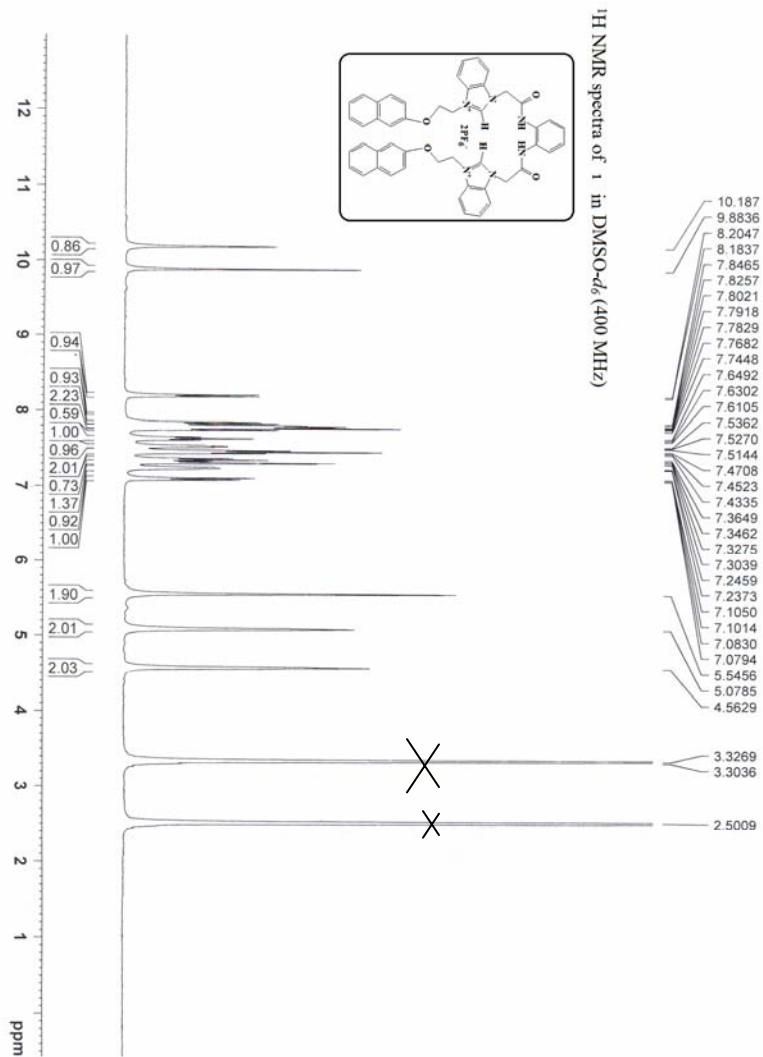

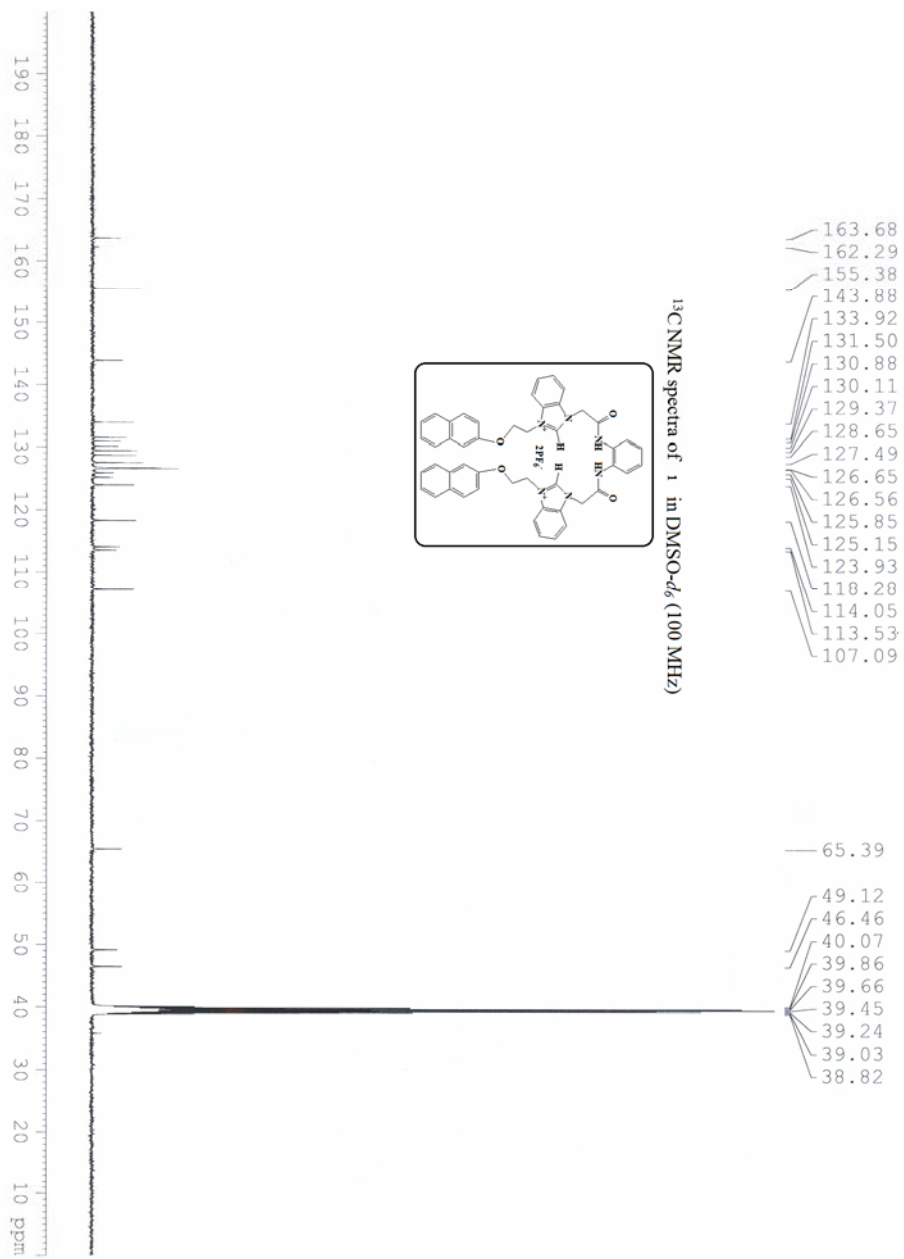

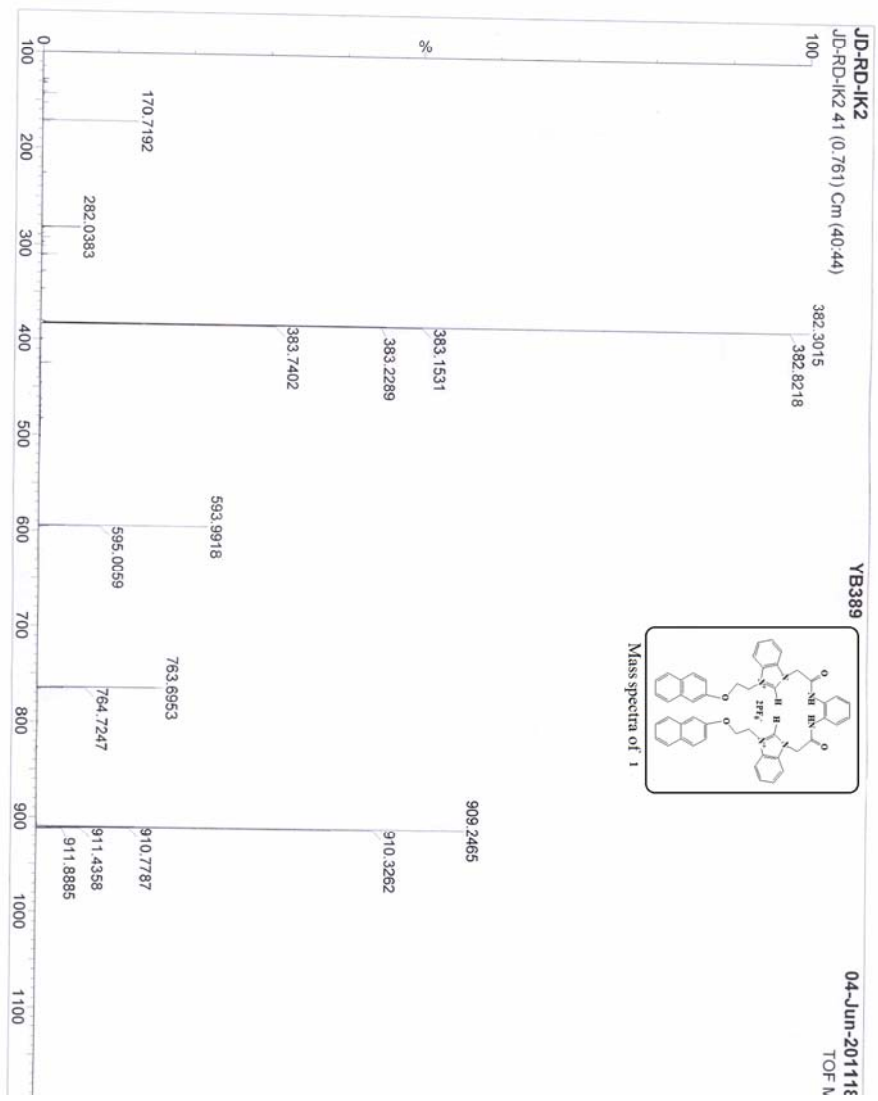

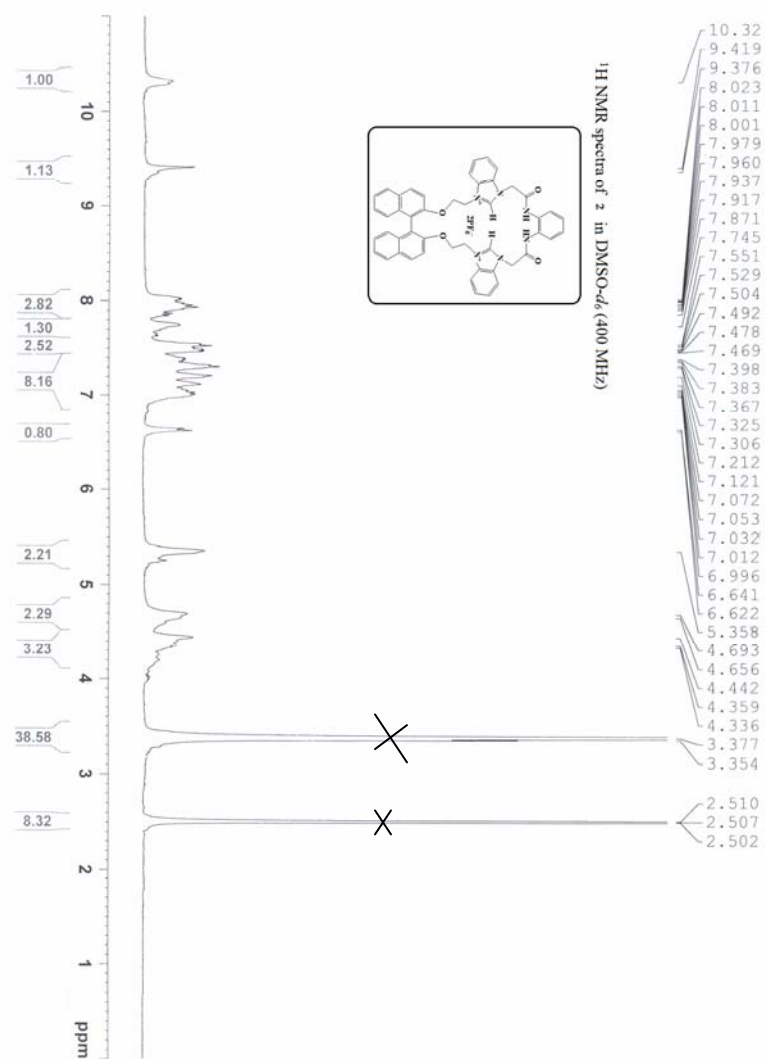



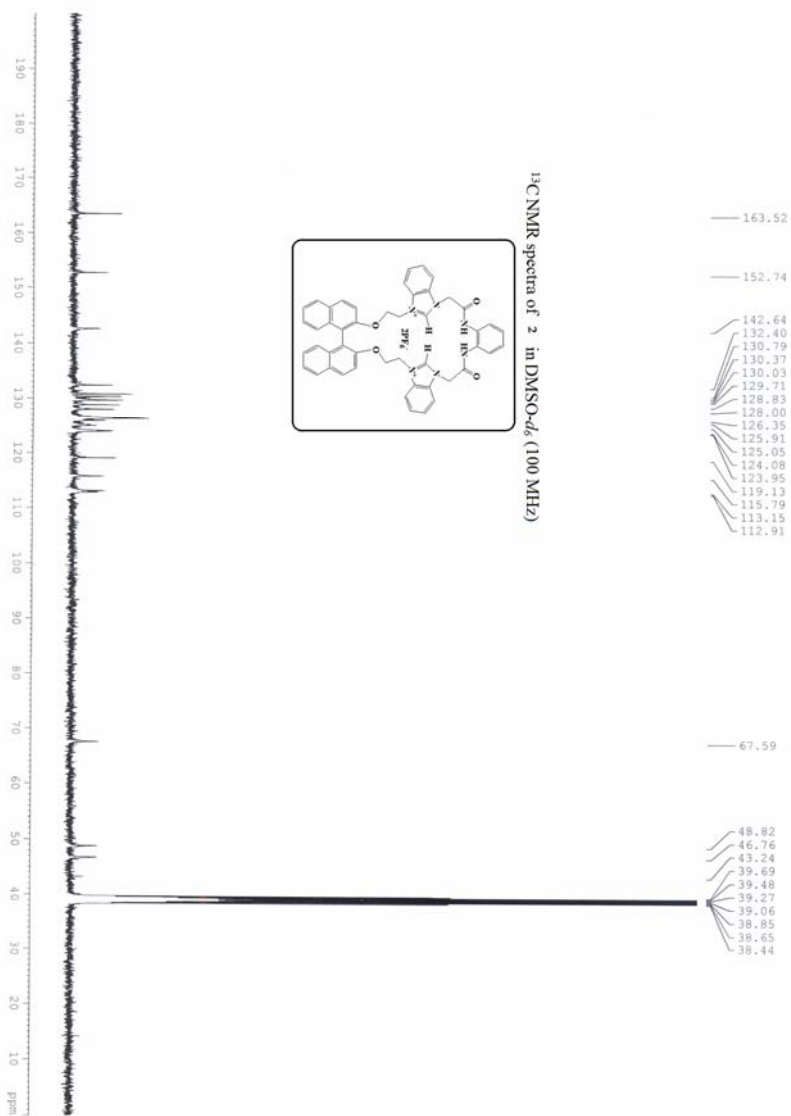

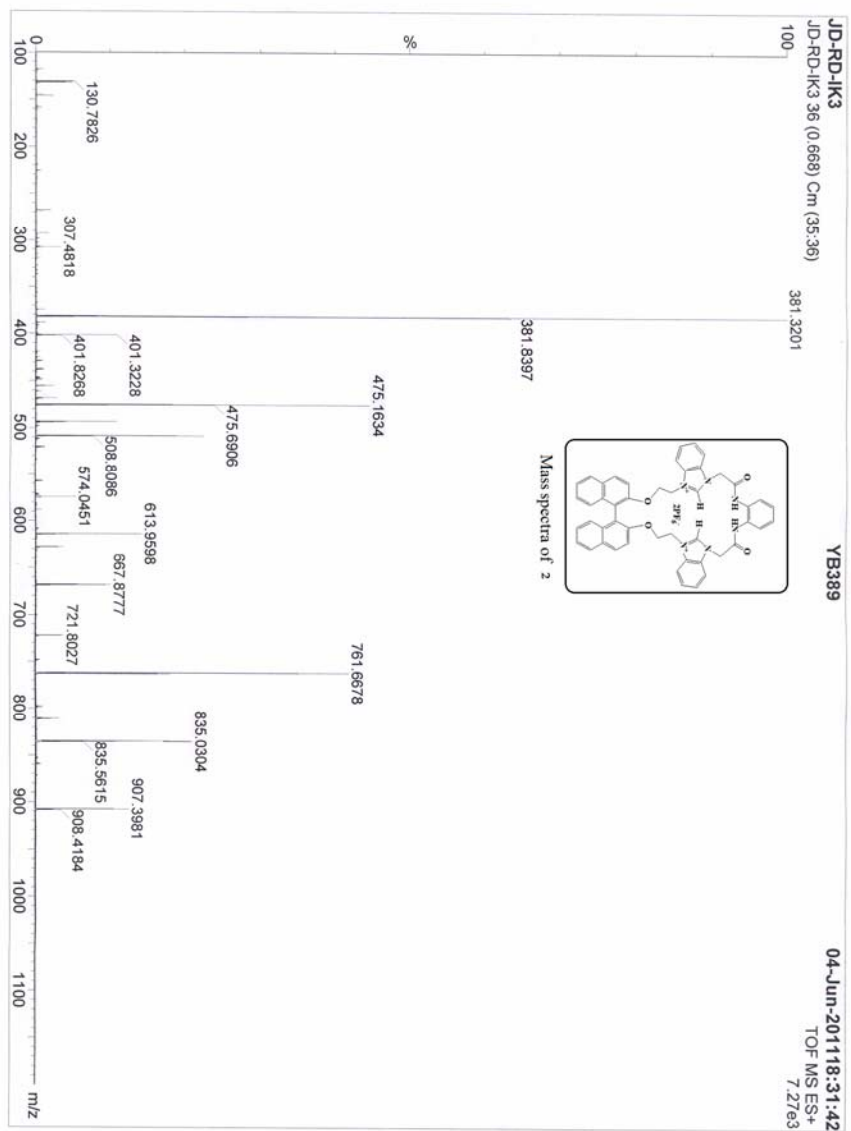

Supplement: c2ob26995c.pdf [file c2ob26995c.pdf]
